# Supplementary material for: SLCO1B1 Genetic Variation Influence on Atorvastatin Systemic Exposure in Pediatric Hypercholesterolemia
Source: MDPI journal article supplement (doi:10.3390/genes15010099), 2024-01-15
Supplement: s1 [file s1]

# Supplementary Figures

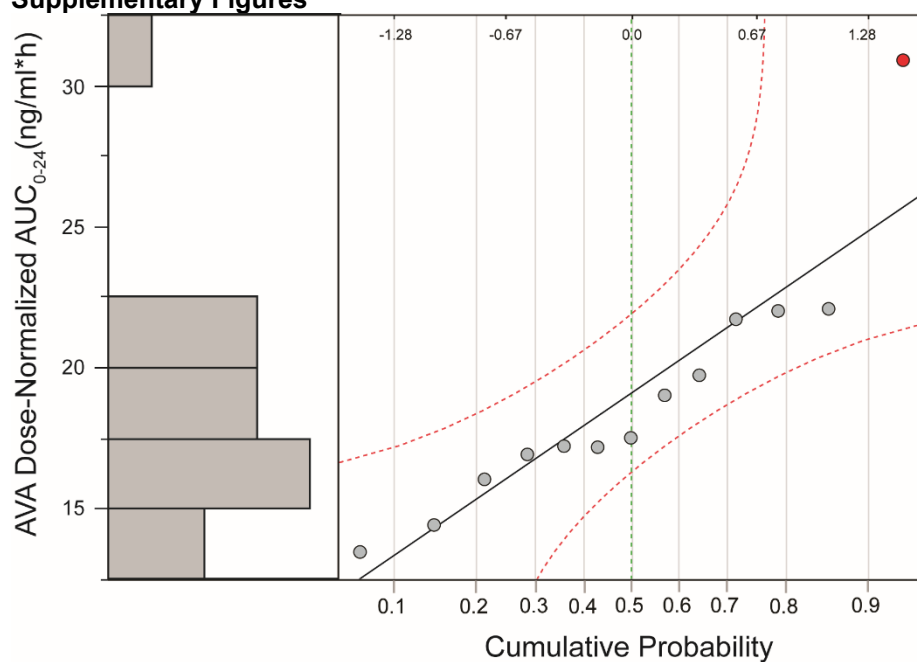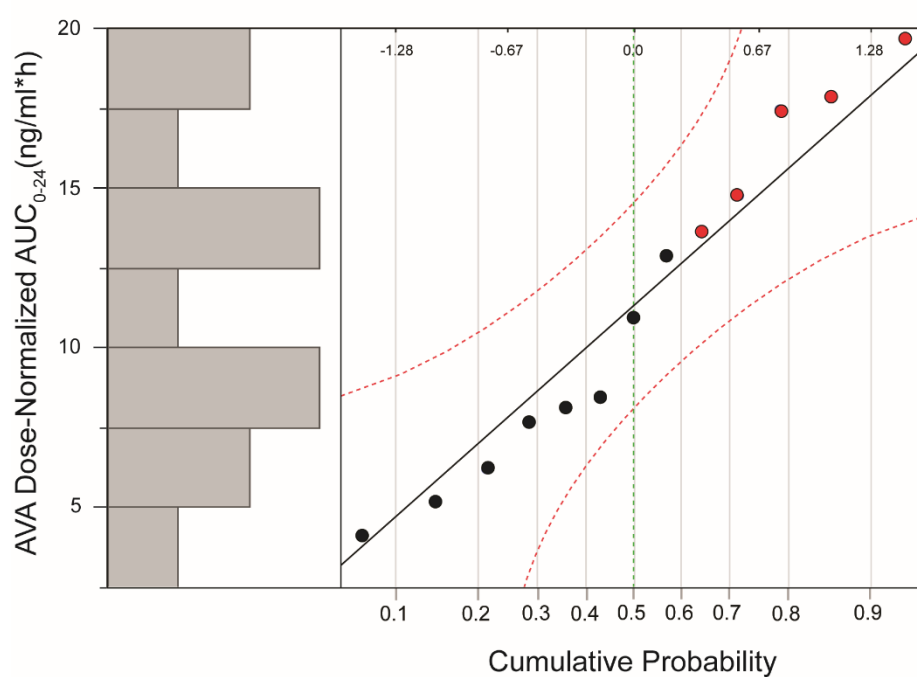

**Supplemental Figure S1.** The normal distribution plots for AVA AUC<sub>0-24</sub> (ng/ml\*h) amongst the c.521T/C and c.521T/T genotypes. Gray circles denote participants with the c.521T/C genotype (n=12). Black circles denote participants with the c.521T/T genotype (n=7). Red circles denote “high exposure subgroup” participants (c.521T/T, n=5; c.521T/C, n=1).

**Supplemental Table S1.** Pharmacokinetic parameters amongst the entire cohort.

|                               | AVA              | AVL            | 2-OH AVA      | 2-OH AVL        |
|-------------------------------|------------------|----------------|---------------|-----------------|
| Cmax (ng/ml)                  | 2.2 (1.6-3.5)    | 0.9 (0.7-1.2)  | 0.7 (0.5-1.0) | 1.1 (0.8-1.6)   |
| AUC <sub>0-24</sub> (ng/ml*h) | 17.1 (11.5-19.7) | 8.7 (4.0-15.0) | 6.4 (4.8-9.4) | 14.5 (5.5-24.1) |

Data expressed as median (IQR).

**Supplemental Table S2.** Correlations between demographic parameters and systemic exposure

|                          | AVA          | AVL            | 2-OH AVA     | 2-OH AVL        |
|--------------------------|--------------|----------------|--------------|-----------------|
| Age (yr)                 | 0.10 (0.60)  | -0.44 (0.02)   | 0.33 (0.09)  | -0.41 (0.03)    |
| Height (cm)              | -0.07 (0.73) | -0.61 (<0.001) | 0.10 (0.60)  | -0.60 (<0.001)  |
| Height (Z-Score)         | -0.22 (0.23) | 0.07 (0.72)    | -0.33 (0.09) | 0.06 (0.74)     |
| Weight (kg)              | 0.09 (0.63)  | -0.68 (<0.001) | 0.10 (0.59)  | -0.81 (<0.0001) |
| Weight (Z-score)         | 0.20 (0.33)  | -0.39 (0.04)   | 0.03 (0.89)  | -0.57 (0.001)   |
| BMI (kg/m <sup>2</sup> ) | 0.14 (0.53)  | -0.57 (0.001)  | 0.09 (0.65)  | -0.73 (<0.0001) |
| BMI (Z-score)            | 0.28 (0.14)  | -0.28 (0.15)   | 0.12 (0.54)  | -0.48 (0.009)   |

Data expressed as correlation coefficient R values and (p-values).

**Supplement Table S3.** Atorvastatin and atorvastatin analyte parameters stratified by demographic and developmental parameters

|                     | AVA<br>AUC <sub>0-24</sub><br>(ng/ml*h) | AVL<br>AUC <sub>0-24</sub><br>(ng/ml*h) | 2-OH AVA<br>AUC <sub>0-24</sub><br>(ng/ml*h) | 2-OH AVL<br>AUC <sub>0-24</sub><br>(ng/ml*h) |
|---------------------|-----------------------------------------|-----------------------------------------|----------------------------------------------|----------------------------------------------|
| <b>Gender</b>       |                                         |                                         |                                              |                                              |
| Female              | 15.7 (± 6.0)                            | 12.1 (± 9.3)                            | 7.3 (± 2.8)                                  | 18.0 (± 12.1)                                |
| Male                | 17.1 (± 8.7)                            | 10.7 (± 9.5)                            | 7.0 (± 3.5)                                  | 15.7 (± 13.2)                                |
| p value             | 0.56                                    | 0.76                                    | 0.56                                         | 0.53                                         |
| <b>Ethnicity</b>    |                                         |                                         |                                              |                                              |
| White, non-Hispanic | 15.0 (± 6.1)                            | 10.0 (± 7.7)                            | 6.9 (± 2.7)                                  | 16.4 (± 12.9)                                |
| White, Hispanic     | 18.7 (± 9.4)                            | 13.2 (± 11.9)                           | 7.6 (± 4.0)                                  | 17.2 (± 13.8)                                |
| African-American    | 14.0 (± 0.7)                            | 11.4 (± 1.1)                            | 6.1 (± 0.1)                                  | 16.7 (± 2.7)                                 |
| p value             | 0.26                                    | 0.72                                    | 0.96                                         | 0.89                                         |
| <b>Tanner</b>       |                                         |                                         |                                              |                                              |
| Breast/Testicular   |                                         |                                         |                                              |                                              |
| Stage 1             | N/A                                     | N/A                                     | N/A                                          | N/A                                          |
| Stage 2             | 17.9 (± 11.2)                           | 23.3 (± 11.5)                           | 6.0 (± 2.0)                                  | 31.9 (± 13.5)                                |
| Stage 3             | 19.1                                    | 17.3                                    | 6.0                                          | 23.4                                         |
| Stage 4             | 9.2 (± 5.6)                             | 7.9 (± 6.2)                             | 4.7 (± 2.1)                                  | 13.4 (± 10.6)                                |
| Stage 5             | 17.5 (± 6.2)                            | 8.5 (± 6.5)                             | 8.1 (± 3.3)                                  | 12.9 (± 9.9)                                 |
| p value             | 0.20                                    | 0.04                                    | 0.13                                         | 0.05                                         |
| Pubic               |                                         |                                         |                                              |                                              |
| Stage 1             | 8.5                                     | 15.4                                    | 5.1                                          | 39.2                                         |

|         |                   |                   |                  |                    |
|---------|-------------------|-------------------|------------------|--------------------|
| Stage 2 | 23.0 ( $\pm$ 8.5) | 27.7 ( $\pm$ 7.9) | 6.7 ( $\pm$ 1.9) | 32.7 ( $\pm$ 11.1) |
| Stage 3 | 8.1               | 7.8               | 4.1              | 12.7               |
| Stage 4 | 6.4 ( $\pm$ 1.3)  | 5.0 ( $\pm$ 2.5)  | 3.6 ( $\pm$ 0.1) | 8.5 ( $\pm$ 5.8)   |
| Stage 5 | 17.5 ( $\pm$ 6.0) | 8.9 ( $\pm$ 6.6)  | 8.0 ( $\pm$ 3.3) | 13.7 ( $\pm$ 10.2) |
| p value | 0.02              | 0.02              | 0.04             | 0.05               |

All data expressed as mean ( $\pm$  SD); Kruskal-Wallis test used for all analyses.
